# Supplementary material for: Are Corporate Governance Ratings Biased? Evidence from Institutional Shareholder Services
Source: Research Square preprint supplement (doi:10.21203/rs.3.rs-7685275/v1), 2025-10-16
Supplement: Supplementary file 1 [file 2af6fc52fd37a21902660863.docx]

**Internet Appendix**

**­­Are Corporate Governance Ratings Biased? Evidence from Institutional Shareholder Services**

Table A 1

Description of Data Files and Variables

This table describes the variables contained in the ISS corporate governance ratings data. The data is contained in three text files (‘Answers.txt’; ‘Scores.txt’; ‘Metadata.txt’). We convert and merge the text files using stata.

| Variable name |  | File |  | Description |
| --- | --- | --- | --- | --- |
|  | Answers | Scores | Metadata |  |
| company_id | Yes | Yes | Yes | Numerical unique company ID |
| company_name | Yes | Yes | Yes | Company name |
| country | Yes | Yes |  | Country code |
| region | Yes | Yes |  | ISS grouping for relative ranking |
| updated | Yes | Yes |  | Date that ISS last updated the information in file |
| question_id | Yes |  |  | Governance question numerical code |
| question | Yes |  |  | Governance question text |
| subcategory | Yes |  |  | Subcategory of governance question |
| answer_id | Yes |  |  | Governance answer numerical code |
| answer_val | Yes |  |  | Governance answer numerical value (if applicable) |
| answer | Yes |  |  | Governance answer text |
| points | Yes |  |  | Governance answer points allocated by ISS |
| displaytext | Yes |  |  | Governance answer text (more detailed than answer) |
| overall_raw |  | Yes |  | Sum of points for all questions |
| overall_score |  | Yes |  | Decile rank of all points within region |
| audit_raw |  | Yes |  | Sum of points for audit questions |
| audit_score |  | Yes |  | Decile rank of audit points within region |
| board_structure_raw |  | Yes |  | Sum of points for board structure questions |
| board_structure_score |  | Yes |  | Decile rank of board structure points within region |
| shareholder_rights_raw |  | Yes |  | Sum of points for shareholder rights questions |
| shareholder_rights_score |  | Yes |  | Decile rank of shareholder rights points within region |
| compensation_raw |  | Yes |  | Sum of points for compensation questions |
| compensation_score |  | Yes |  | Decile rank of compensation points within region |
| indic_ticker |  |  | Yes | Company ticker |
| indic_isin |  |  | Yes | Company ISIN |
| indic_cusip |  |  | Yes | Company CUSIP |
| indic_sedol |  |  | Yes | Company SEDOL |

Table A 2

Population of Corporate Governance Ratings by Region

This table describes the population of ISS corporate governance ratings by region over years 2013-2021. The data is drawn from the daily text files provided by ISS using the text file from 31st December in each year.

| Region | Ratings | Unique Firms |
| --- | --- | --- |
| Africa | 670 | 113 |
| Anglo | 3,493 | 670 |
| Asia Pacific | 1,748 | 586 |
| Australasia | 2,006 | 380 |
| Canada | 2,029 | 315 |
| Canada Small Cap | 1,051 | 270 |
| Germanic | 1,903 | 399 |
| India | 670 | 137 |
| Japan | 3,403 | 519 |
| Latin America | 527 | 86 |
| Nordic | 1,621 | 493 |
| Russia | 304 | 51 |
| Southern Europe | 1,177 | 223 |
| South Korea | 818 | 146 |
| US - R3K | 21,717 | 4,125 |
| US - S&P500 | 4,475 | 512 |
| Western Europe | 2,117 | 418 |
| All | 49,729 | 9,443 |
| Percentage of US ratings and firms | 52.7% | 49.1% |

Table A 3

ISS Governance Questions

This table reports the ISS questions over the sample period for US firms.

| Question ID | Question | Years |
| --- | --- | --- |
| 1 | Non-audit fees represent what percentage of total fees? | 2013-2021 |
| 2 | Did the auditor issue an adverse opinion in the past year? | 2013-2021 |
| 3 | Has the company restated financials for any period within the past two fiscal years? | 2013-2021 |
| 4 | Has the company made non-timely financial disclosure filings in the past two years? | 2013-2021 |
| 5 | Has a regulator initiated enforcement action against the company in the past two years? | 2013-2021 |
| 6 | How many financial experts serve on the audit committee? | 2014-2021 |
| 8 | Has the company disclosed any material weaknesses in its internal controls in the past two years? | 2013-2021 |
| 9 | How many directors serve on the board? | 2014-2021 |
| 10 | What percentage of the board is independent based on an ISS local market classification? | 2013-2021 |
| 13 | What proportion of non-executive directors on the board has lengthy tenure? | 2014-2021 |
| 14 | What is the classification of the Chairman of the Board? | 2013-2021 |
| 16 | Has the company identified a Senior Independent Director or an independent Lead Director? | 2013-2021 |
| 19 | What is the independent status of the nominating committee members? | 2013-2021 |
| 23 | What is the classification of the chair of the nominating committee? | 2017-2021 |
| 25 | What is the independent status of the compensation committee members? | 2013-2021 |
| 27 | Are there executives on the compensation committee? | 2017-2021 |
| 28 | What is the classification of the chair of the compensation / remuneration committee? | 2017-2021 |
| 31 | What percentage of the audit committee is independent according to ISS' local market classification? | 2013-2021 |
| 33 | Are there executive directors on the audit committee? | 2017-2021 |
| 34 | What is the classification of the chair of the audit committee? | 2017-2021 |
| 36 | How many executive directors serve on an excessive number of outside boards? | 2021 |
| 37 | Does the CEO serve on a significant number of outside boards? / How many boards does the CEO sit on (US only)? | 2013-2021 |
| 38 | How many non-executive directors serve on a significant number of outside boards? | 2013-2021 |
| 39 | Does the Board Chair serve on a significant number of outside boards? | 2021 |
| 41 | Does the company disclose a policy requiring an annual performance evaluation of the board? | 2014-2021 |
| 44 | What percentage of the directors attended less than 75% of board and/or key committee meetings? | 2017-2021 |
| 45 | Did any directors attend less than 75% of the aggregate board and applicable key committee meetings without a valid excuse? | 2013-2021 |
| 46 | Does the company disclose board/governance guidelines? | 2013-2021 |
| 49 | How many directors received withhold/ against votes of 50% or greater at the last annual meeting? | 2013-2021 |
| 50 | What percent of the directors were involved in material related-party transactions (RPTs)? | 2013-2021 |
| 51 | Do the directors with RPTs sit on key board committees? | 2013-2021 |
| 52 | Does the company have a majority vote standard in uncontested elections? | 2013-2021 |
| 54 | Does the company have classes of stock with different voting rights or unequal ability to elect directors? | 2013-2021 |
| 55 | Are there any directors on the board who are not up for election by all classes of common shareholders? | 2013-2021 |
| 56 | Is there a sunset provision on the company's unequal voting structure? | 2014-2021 |
| 57 | What is the percentage of multiple voting rights or voting certificates relative to total voting rights? | 2021 |
| 63 | What percentage of issued share capital is composed of non-voting shares? | 2021 |
| 77 | Are all directors elected annually? | 2013-2021 |
| 78 | Does the company have a poison pill (shareholder rights plan) in effect? | 2013-2021 |
| 79 | What is the trigger threshold for the poison pill? | 2013-2021 |
| 80 | Does the poison pill have a sunset provision? | 2013-2021 |
| 81 | Does the poison pill have a TIDE provision? | 2013-2016 |
| 82 | Does the poison pill have a qualified offer clause? | 2013-2021 |
| 83 | Is the board authorized to issue blank check preferred stock? | 2013-2021 |
| 89 | Does the company require a super-majority vote to approve amendments to the charter or bylaws? | 2013-2021 |
| 90 | Does the company require a supermajority vote to approve mergers or business combinations? | 2013-2021 |
| 91 | What is the expiration date of the poison pill? | 2013-2021 |
| 97 | What is the percentage of share capital needed to convene a special meeting? | 2013-2021 |
| 98 | Can shareholders act by written consent? | 2013-2021 |
| 99 | Has the board adequately addressed a shareholder resolution supported by a majority vote? | 2013-2021 |
| 113 | What is the level of disclosure on performance measures for the short-term incentive plan for executives? | 2013-2021 |
| 129 | Do the company's active equity plans prohibit share recycling for options/SARS? | 2013-2021 |
| 130 | Does the company's equity grant rate exceed the mean plus 1 standard deviation of its industry/index peers? | 2013-2021 |
| 131 | What are the vesting periods mandated in the plan documents for executives' stock options or SARS in the equity plans adopted/amended in the last 3 years? | 2013-2021 |
| 132 | What are the vesting periods mandated in the plan documents, adopted/amended in the last three years, for executives' restricted stock / stock awards? | 2013-2021 |
| 134 | What is the holding or retention period for stock options for executives? | 2013-2021 |
| 135 | What is the holding/retention period for restricted shares / stock awards (for executives)? | 2013-2021 |
| 138 | Do the company's active equity plans prohibit option/ SAR repricing? | 2013-2021 |
| 139 | Has the company repriced options or exchanged them for shares, options, or cash without shareholder approval in the last three years? | 2013-2021 |
| 143 | Are directors subject to stock ownership guidelines? | 2013-2021 |
| 144 | Do all directors with more than one year of service own stock, (who can legally/practically do so)? | 2013-2021 |
| 145 | What proportion of the salary is subject to stock ownership requirements or guidelines for the CEO? | 2013-2021 |
| 148 | What's the trigger under the change-in-control agreements? | 2013-2021 |
| 153 | Do equity based plans or other long term awards vest completely upon a change in control? | 2013-2021 |
| 155 | Did the company disclose a claw back or malus provision? | 2013-2021 |
| 156 | Are any of the NEOs eligible for multi-year guaranteed bonuses? | 2013-2021 |
| 161 | What is the multiple of pay in the severance agreements for the CEO upon a change-in-control? | 2013-2021 |
| 162 | Does the company provide excise tax gross-ups for change-in-control payments? | 2013-2021 |
| 163 | What is the length of employment agreement with the CEO? | 2013-2021 |
| 200 | Has a regulator initiated enforcement action against a director or officer of the company in the past two years? | 2013-2021 |
| 201 | Is the company, or any of its directors and officers, currently under investigation by a regulatory body? | 2013-2021 |
| 205 | What percentage of the board consists of immediate family members of majority shareholders, executives and former executives (within the past five years)? | 2013-2021 |
| 206 | What percentage of the board are former or current employees of the company? | 2013-2021 |
| 216 | Are there material related-party transactions (RPTs) involving the CEO? | 2013-2021 |
| 220 | Is the poison pill designed to preserve tax assets (NOL pill)? | 2013-2021 |
| 222 | When was the poison pill implemented or renewed? | 2013-2021 |
| 223 | Does the company's poison pill include a modified slow-hand or dead-hand provision? | 2013-2021 |
| 224 | If the company has a majority voting standard, is there a plurality carve-out in the case of contested elections? | 2013-2021 |
| 225 | Are there material restrictions as to timing or topics to be discussed, or ownership levels required to call the meeting? | 2013-2021 |
| 226 | is the degree of alignment between the company's cumulative 3-year pay percentile rank, relative to peers, and its 3-year cumulative TSR rank, relative to peers? | 2013-2016 |
| 227 | is the degree of alignment between the company's cumulative 1-year pay percentile rank, relative to peers, and its 1-year cumulative TSR rank, relative to peers? | 2013-2016 |
| 228 | What is the size of the CEO's 1-year pay as a multiple of the median pay for the company's peers (MOM)? | 2013-2021 |
| 229 | What is the degree of alignment between the company's TSR and change in CEO pay over the past five years (PTA)? | 2013-2021 |
| 232 | What is the ratio of the CEO's total compensation to the next highest paid executive? | 2013-2021 |
| 237 | What is the ratio of the CEO's non-performance-based compensation (All Other Compensation) to Base Salary? | 2013-2021 |
| 238 | Does the company's active equity plans prohibit option/ SAR cash buyouts? | 2013-2021 |
| 239 | Do the company's active equity plans have an evergreen provision? | 2013-2021 |
| 240 | Do the company's active equity plans have liberal CIC vesting provisions? | 2013-2021 |
| 243 | Did any executive or director pledge company shares? | 2013-2021 |
| 244 | Does the company have a policy prohibiting hedging of company shares by employees? | 2013-2021 |
| 246 | What is the level of disclosure on performance measures for the latest active or proposed long term incentive plan? | 2013-2021 |
| 247 | What is the basis for the change-in-control payment for the CEO? | 2013-2021 |
| 290 | Does the company have a controlling shareholder? | 2014-2021 |
| 300 | Has the ISS qualitative review identified a pay-for-performance misalignment? | 2013-2021 |
| 301 | Has ISS identified a problematic pay practice or policy that raises concern? | 2013-2021 |
| 304 | What is the number / proportion of women on the board? | 2014-2021 |
| 306 | Are there executives on the nominating committee? | 2017-2021 |
| 312 | What percentage of directors received shareholder approval rates below 80%? | 2014-2021 |
| 315 | What was the average outside director's total compensation / remuneration as a multiple of the ISS peer median? | 2014-2021 |
| 328 | Did the most recent Say on Pay proposal receive significant opposition from shareholders? | 2014-2021 |
| 329 | of alignment between the company's annualized three-year pay percentile rank, relative to peers, and its three-year annualized TSR rank, relative to peers (RDA)? | 2014-2021 |
| 345 | Has ISS determined that the board had problematic governance practices that reduced shareholder rights? | 2014-2021 |
| 346 | Does the company provide proxy access to shareholders? | 2015-2021 |
| 347 | What is the tenure of the external auditor? | 2016-2021 |
| 348 | Does the company disclose the existence of a formal CEO and key executive officers' succession plan? | 2016-2021 |
| 349 | Does the board have any mechanisms to encourage director refreshment? | 2016-2021 |
| 350 | Has the board adequately responded to low vote support for a management proposal? | 2016-2021 |
| 351 | Does the company have an exclusive venue or forum provision? | 2016-2021 |
| 352 | Can the board materially modify the company's capital structure without shareholder approval? | 2016-2021 |
| 353 | Does the company employ at least one metric that compares its performance to a benchmark or peer group (relative performance)? | 2016-2021 |
| 354 | What is the proportion of women on the board? | 2016-2021 |
| 355 | What proportion of non-executive directors has been on the board less than 6 years? | 2016-2021 |
| 359 | What is the ownership threshold for proxy access? | 2016-2021 |
| 360 | What is the ownership duration threshold for proxy access? | 2016-2021 |
| 361 | What is the cap on shareholder nominees to fill board seats from proxy access? | 2016-2021 |
| 362 | What is the aggregation limit on shareholders to form a nominating group for proxy access? | 2016-2021 |
| 363 | Does the company have a fee-shifting provision? | 2016-2021 |
| 364 | Does the company have a representative claim limitation or other significant litigation rights limitations? | 2016-2021 |
| 378 | What percentage of the board is independent based on an ISS global classification? | 2017-2021 |
| 380 | What percentage of the nominating committee is independent based on an ISS global classification? | 2017-2021 |
| 381 | What percentage of the compensation committee is independent based on an ISS global classification? | 2017-2021 |
| 382 | What percentage of the audit committee is independent, based on an ISS global classification? | 2017-2021 |
| 383 | What was the lowest percentage of vote support received by management-nominated directors at their most recent annual meeting? | 2018-2021 |
| 384 | What is the percentage of votes outstanding controlled by shares with enhanced voting rights? | 2018-2021 |
| 385 | What was the percentage of vote support received from shareholders on the most recent Say-on-Pay or remuneration proposal? | 2018-2021 |
| 386 | How many women serve in leadership roles on the board? | 2018-2021 |
| 387 | How many women are named executive officers at the company as of the last annual meeting? | 2018-2021 |
| 388 | What is the standard deviation of director age? | 2018-2021 |
| 389 | What is the standard deviation of director tenure (in years)? | 2018-2021 |
| 390 | Does the board exhibit ethnic or racial diversity? | 2021 |
| 391 | What was the percentage of vote support for the CEO at the most recent annual meeting? | 2018-2021 |
| 392 | What was the percentage of vote support for the Board Chair at the most recent annual meeting? | 2018-2021 |
| 393 | What was the greatest percentage of vote support for environmental or social shareholder resolutions at the most recent annual meeting? | 2019-2021 |
| 394 | What is the level of disclosure on environmental or social performance measures for the short-term incentive plan for executives? | 2019-2021 |
| 395 | What is the level of disclosure on environmental or social performance measures for any long-term incentive plan for executives granted in the last fiscal year? | 2019-2021 |
| 396 | What percentage of the sustainability committee is independent? | 2021 |
| 398 | What is the level of disclosure on diversity and inclusion performance measures for the short-term or any long-term incentive plan for executives? | 2021 |
| 399 | Has the company made special grants to executives excluding the CEO in the most recent fiscal year? | 2021 |
| 400 | What percentage of the CEO's total compensation was due to special grants in the most recent fiscal year? | 2021 |
| 401 | What percentage of the board has familial relationships with other directors? | 2021 |
| 402 | Does the company disclose an approach on identifying and mitigating information security risks? | 2021 |
| 403 | What percentage of the committee responsible for information security is independent? | 2021 |
| 404 | How often does senior leadership brief the board on information security matters? | 2021 |
| 405 | How many directors with information security experience are on the board? | 2021 |
| 406 | What are the net expenses incurred from information security breaches over the last three years relative to total revenue? | 2021 |
| 407 | Has the company experienced an information security breach in the last three years? | 2021 |
| 408 | What are the net expenses incurred from information security breach penalties and settlements over the last three years relative to total revenue? | 2021 |
| 409 | Has the company entered into an information security risk insurance policy? | 2021 |
| 410 | Is the company externally audited or certified by top information security standards? | 2021 |
| 411 | Does the company have an information security training program? | 2021 |
| 412 | How long ago did the most recent information security breach occur (in months)? | 2021 |

Table A 4

Descriptive Statistics for Points

This table provides descriptive statistics for the variable *Points*, defined as the points allocated by ISS to each *Answer ID* and/or *Answer Value.* Variable definitions are described in the Appendix Table.

|  | Mean | Std. dev. | Min | 1% | 25% | Median | 75% | 99% | Max | Obs. |
| --- | --- | --- | --- | --- | --- | --- | --- | --- | --- | --- |
| S&P500 |  |  |  |  |  |  |  |  |  |  |
| 2013 | -0.0211 | 1.6377 | -16.0000 | -6.5285 | 0.0000 | 0.0000 | 0.0000 | 4.3311 | 5.7209 | 39,263 |
| 2014 | 0.0530 | 0.8363 | -7.9349 | -2.5005 | 0.0000 | 0.0000 | 0.0648 | 2.8016 | 3.1948 | 45,318 |
| 2015 | 0.0628 | 0.8410 | -8.6795 | -2.5005 | 0.0000 | 0.0000 | 0.1187 | 2.8016 | 3.8932 | 45,448 |
| 2016 | 0.1033 | 0.7529 | -5.8539 | -2.1122 | 0.0000 | 0.0000 | 0.2868 | 2.7731 | 4.4840 | 53,286 |
| 2017 | 0.0454 | 0.3507 | -7.3425 | -0.6145 | 0.0000 | 0.0000 | 0.0855 | 1.4533 | 1.4533 | 57,040 |
| 2018 | 0.0396 | 0.2966 | -6.1029 | -0.8034 | 0.0000 | 0.0000 | 0.0554 | 0.9896 | 1.1983 | 61,876 |
| 2019 | 0.0398 | 0.2957 | -6.1029 | -0.8034 | 0.0000 | 0.0000 | 0.0554 | 0.9896 | 1.1983 | 63,119 |
| 2020 | 0.0411 | 0.2982 | -6.1029 | -0.8034 | 0.0000 | 0.0000 | 0.0598 | 0.9896 | 1.1983 | 63,119 |
| 2021 | 0.0388 | 0.2610 | -3.1500 | -0.7500 | 0.0000 | 0.0000 | 0.0714 | 0.8647 | 1.1250 | 73,852 |
| All | 0.0457 | 0.6742 | -16.0000 | -1.8947 | 0.0000 | 0.0000 | 0.0673 | 2.4626 | 5.7209 | 502,321 |
| R3K |  |  |  |  |  |  |  |  |  |  |
| 2013 | -0.1521 | 1.0240 | -12.2435 | -5.0905 | 0.0000 | 0.0000 | 0.0000 | 1.7564 | 5.7209 | 178,777 |
| 2014 | -0.0882 | 1.1614 | -11.2379 | -5.6198 | 0.0000 | 0.0000 | 0.0000 | 3.2316 | 3.8932 | 214,123 |
| 2015 | -0.0855 | 1.1561 | -11.2379 | -5.6198 | 0.0000 | 0.0000 | 0.0000 | 3.2316 | 3.8932 | 217,304 |
| 2016 | -0.0614 | 1.0337 | -10.8710 | -4.7975 | 0.0000 | 0.0000 | 0.0000 | 2.8376 | 4.4840 | 265,146 |
| 2017 | -0.0040 | 0.3880 | -7.3425 | -1.0294 | 0.0000 | 0.0000 | 0.0000 | 1.4533 | 1.4533 | 278,300 |
| 2018 | -0.0102 | 0.3349 | -6.1029 | -1.0777 | 0.0000 | 0.0000 | 0.0000 | 0.9896 | 1.1983 | 300,328 |
| 2019 | -0.0084 | 0.3382 | -6.1029 | -1.0612 | 0.0000 | 0.0000 | 0.0000 | 0.9896 | 1.1983 | 309,245 |
| 2020 | -0.0088 | 0.3437 | -6.1029 | -1.0580 | 0.0000 | 0.0000 | 0.0000 | 0.9896 | 1.1983 | 321,437 |
| 2021 | -0.0090 | 0.2783 | -3.1500 | -0.8750 | 0.0000 | 0.0000 | 0.0000 | 0.8647 | 1.1250 | 360,528 |
| All | -0.0383 | 0.7098 | -12.2435 | -2.6250 | 0.0000 | 0.0000 | 0.0000 | 1.4533 | 5.7209 | 2,445,188 |

Table A 5

Descriptive Statistics for Sum of Points

This table provides descriptive statistics for the *Sum of Points* variable, defined as the sum of *Points* across all questions for each firm in each index-year. Variable definitions are described in the Appendix Table.

|  | Mean | Std. dev. | Min | 1% | 25% | Median | 75% | 99% | Max | Obs. |
| --- | --- | --- | --- | --- | --- | --- | --- | --- | --- | --- |
| S&P500 |  |  |  |  |  |  |  |  |  |  |
| 2013 | -1.6538 | 17.7919 | -90.7586 | -61.3562 | -11.0805 | 1.9554 | 10.407 | 27.7824 | 33.0794 | 497 |
| 2014 | 4.8234 | 9.0718 | -50.6837 | -25.4245 | 0.1307 | 6.1168 | 11.093 | 19.6775 | 21.1494 | 498 |
| 2015 | 5.7762 | 9.3215 | -49.5876 | -27.0693 | 1.6214 | 7.8862 | 12.1539 | 20.5494 | 21.9086 | 494 |
| 2016 | 11.0559 | 9.7279 | -41.3824 | -23.8092 | 5.3166 | 12.7533 | 18.121 | 27.0972 | 29.4076 | 498 |
| 2017 | 5.2267 | 5.2118 | -24.1148 | -15.1765 | 4.1205 | 6.6693 | 8.3873 | 11.0531 | 12.2489 | 496 |
| 2018 | 4.9114 | 4.8322 | -23.1946 | -13.6264 | 2.9769 | 6.1656 | 8.0474 | 10.9348 | 12.1223 | 499 |
| 2019 | 5.0603 | 4.9145 | -26.0487 | -13.8882 | 3.5601 | 6.1713 | 8.1532 | 11.8165 | 12.1448 | 497 |
| 2020 | 5.2146 | 4.8631 | -28.9932 | -14.1889 | 3.7838 | 6.3895 | 8.2538 | 11.4335 | 12.9678 | 497 |
| 2021 | 5.7495 | 5.0032 | -19.0542 | -12.4353 | 4.3769 | 7.0329 | 8.8894 | 12.3539 | 14.0527 | 499 |
| All | 5.1303 | 9.3349 | -90.7586 | -29.0232 | 2.566 | 6.6668 | 9.3865 | 22.8679 | 33.0794 | 4,475 |
| R3K |  |  |  |  |  |  |  |  |  |  |
| 2013 | -12.0177 | 12.5227 | -74.4206 | -48.9205 | -19.1187 | -10.4558 | -2.9555 | 10.5472 | 16.3679 | 2263 |
| 2014 | -8.0241 | 14.2484 | -60.7517 | -44.796 | -17.5491 | -7.6 | 2.2527 | 20.8232 | 27.7408 | 2353 |
| 2015 | -7.8692 | 15.0092 | -69.8273 | -43.7047 | -18.0885 | -7.3629 | 3.2737 | 21.975 | 29.1117 | 2362 |
| 2016 | -6.5649 | 15.8271 | -68.0563 | -44.3309 | -17.5373 | -5.9531 | 5.5154 | 25.4111 | 30.8292 | 2478 |
| 2017 | -0.4575 | 6.5917 | -25.4417 | -20.196 | -4.144 | 0.9593 | 4.5185 | 9.2045 | 10.4345 | 2420 |
| 2018 | -1.2731 | 5.9781 | -23.3843 | -17.5295 | -5.3117 | -0.578 | 3.3769 | 8.9443 | 11.8205 | 2422 |
| 2019 | -1.0687 | 6.1589 | -23.3575 | -17.2756 | -5.1896 | -0.2785 | 3.7881 | 9.2179 | 11.9313 | 2435 |
| 2020 | -1.1116 | 6.3814 | -25.9751 | -18.101 | -5.6327 | 0.0251 | 3.9 | 9.5295 | 11.4418 | 2531 |
| 2021 | -1.333 | 6.6925 | -26.3816 | -18.641 | -6.238 | -0.5067 | 4.147 | 9.8243 | 11.5218 | 2436 |
| All | -4.3219 | 11.4027 | -74.4206 | -39.3678 | -9.985 | -2.3351 | 3.5093 | 18.8328 | 30.8292 | 21,700 |

Table A 6

Maximum, Minimum, and Range in Sum of Points by Rating Decile and Sample Year

This table provides the minimum, maximum, and their difference (range) for the *Sum of Points* variable, which is the sum of *Points* across all questions for each firm in each region-year, by *Rating* decile. Variable definitions are described in the Appendix Table.

|  | 2013 | 2014 | 2015 | 2016 | 2017 | 2018 | 2019 | 2020 | 2021 |
| --- | --- | --- | --- | --- | --- | --- | --- | --- | --- |
| S&P500 – Maximum | | | | | | | | | |
| 1 | 33.08 | 21.15 | 21.91 | 29.41 | 12.25 | 12.12 | 12.14 | 12.97 | 14.05 |
| 2 | 17.60 | 15.00 | 15.03 | 21.31 | 9.35 | 9.17 | 9.40 | 9.60 | 10.09 |
| 3 | 11.99 | 12.02 | 12.88 | 18.89 | 8.72 | 8.47 | 8.63 | 8.59 | 9.29 |
| 4 | 8.32 | 10.02 | 11.09 | 17.04 | 8.02 | 7.60 | 7.84 | 7.83 | 8.55 |
| 5 | 5.13 | 8.14 | 9.64 | 14.85 | 7.44 | 6.79 | 7.00 | 7.15 | 7.98 |
| 6 | 1.77 | 6.10 | 7.76 | 12.60 | 6.65 | 6.16 | 6.15 | 6.38 | 7.03 |
| 7 | -2.84 | 4.00 | 5.48 | 10.33 | 5.83 | 5.19 | 5.22 | 5.43 | 6.12 |
| 8 | -7.98 | 1.38 | 2.71 | 7.54 | 4.84 | 3.88 | 4.16 | 4.39 | 5.20 |
| 9 | -15.01 | -1.63 | -0.17 | 3.85 | 3.05 | 1.98 | 2.92 | 2.88 | 3.14 |
| 10 | -24.69 | -6.54 | -6.61 | -2.15 | -0.39 | -0.24 | -0.52 | -0.54 | -1.20 |
| S&P500 – Minimum | | | | | | | | | |
| 1 | 17.65 | 15.01 | 15.03 | 21.43 | 9.37 | 9.20 | 9.41 | 9.61 | 10.10 |
| 2 | 12.21 | 12.20 | 13.07 | 18.90 | 8.73 | 8.48 | 8.65 | 8.60 | 9.31 |
| 3 | 8.42 | 10.08 | 11.09 | 17.20 | 8.03 | 7.64 | 7.87 | 7.84 | 8.57 |
| 4 | 5.22 | 8.15 | 9.64 | 14.94 | 7.45 | 6.81 | 7.00 | 7.16 | 8.00 |
| 5 | 1.78 | 6.11 | 7.82 | 12.71 | 6.66 | 6.17 | 6.16 | 6.38 | 7.03 |
| 6 | -2.56 | 4.09 | 5.51 | 10.33 | 5.83 | 5.21 | 5.23 | 5.44 | 6.14 |
| 7 | -7.97 | 1.39 | 2.76 | 7.65 | 4.94 | 3.89 | 4.17 | 4.41 | 5.20 |
| 8 | -14.65 | -1.41 | -0.15 | 3.86 | 3.08 | 2.03 | 2.94 | 2.88 | 3.16 |
| 9 | -24.04 | -6.16 | -6.56 | -2.11 | -0.39 | -0.22 | -0.51 | -0.48 | -1.14 |
| 10 | -90.76 | -50.68 | -49.59 | -41.38 | -24.11 | -23.19 | -26.05 | -28.99 | -19.05 |
| S&P500 – Range (Maximum minus Minimum) | | | | | | | | | |
| 1 | 15.43 | 6.14 | 6.88 | 7.97 | 2.88 | 2.92 | 2.74 | 3.35 | 3.95 |
| 2 | 5.40 | 2.80 | 1.96 | 2.41 | 0.63 | 0.70 | 0.76 | 1.00 | 0.79 |
| 3 | 3.57 | 1.95 | 1.79 | 1.69 | 0.70 | 0.84 | 0.77 | 0.75 | 0.73 |
| 4 | 3.10 | 1.87 | 1.45 | 2.10 | 0.58 | 0.79 | 0.84 | 0.68 | 0.56 |
| 5 | 3.35 | 2.03 | 1.82 | 2.14 | 0.78 | 0.63 | 0.84 | 0.77 | 0.95 |
| 6 | 4.33 | 2.02 | 2.25 | 2.27 | 0.82 | 0.95 | 0.92 | 0.94 | 0.89 |
| 7 | 5.13 | 2.62 | 2.72 | 2.67 | 0.89 | 1.31 | 1.05 | 1.02 | 0.92 |
| 8 | 6.68 | 2.78 | 2.86 | 3.68 | 1.76 | 1.86 | 1.22 | 1.51 | 2.04 |
| 9 | 9.02 | 4.53 | 6.39 | 5.96 | 3.44 | 2.20 | 3.43 | 3.36 | 4.28 |
| 10 | 66.07 | 44.14 | 42.97 | 39.23 | 23.72 | 22.96 | 25.53 | 28.45 | 17.85 |
| Overall | 123.84 | 71.83 | 71.50 | 70.79 | 36.36 | 35.32 | 38.19 | 41.96 | 33.11 |
| R3K – Maximum | | | | | | | | | |
| 1 | 16.37 | 27.74 | 29.11 | 30.83 | 10.43 | 11.82 | 11.93 | 11.44 | 11.52 |
| 2 | 2.27 | 10.17 | 11.38 | 13.55 | 6.70 | 5.85 | 6.26 | 6.23 | 6.82 |
| 3 | -1.51 | 4.64 | 5.48 | 7.81 | 5.19 | 4.08 | 4.44 | 4.61 | 4.85 |
| 4 | -4.83 | -0.01 | 1.29 | 2.99 | 3.83 | 2.60 | 3.02 | 3.24 | 3.22 |
| 5 | -7.59 | -3.67 | -2.95 | -1.83 | 2.37 | 1.20 | 1.49 | 1.67 | 1.39 |
| 6 | -10.46 | -7.60 | -7.37 | -5.96 | 0.96 | -0.59 | -0.29 | 0.00 | -0.51 |
| 7 | -13.37 | -11.12 | -11.61 | -10.29 | -0.57 | -2.27 | -2.08 | -2.04 | -2.65 |
| 8 | -16.80 | -15.38 | -15.85 | -15.11 | -2.93 | -4.10 | -4.06 | -4.38 | -5.00 |
| 9 | -21.53 | -20.25 | -20.70 | -20.36 | -5.78 | -6.38 | -6.47 | -6.75 | -7.50 |
| 10 | -28.25 | -26.05 | -27.89 | -27.96 | -9.52 | -9.48 | -9.67 | -10.12 | -10.37 |
| R3K – Minimum | | | | | | | | | |
| 1 | 2.29 | 10.19 | 11.41 | 13.58 | 6.70 | 5.85 | 6.26 | 6.23 | 6.82 |
| 2 | -1.51 | 4.68 | 5.52 | 7.81 | 5.19 | 4.09 | 4.45 | 4.61 | 4.87 |
| 3 | -4.80 | 0.04 | 1.30 | 2.99 | 3.83 | 2.60 | 3.02 | 3.25 | 3.22 |
| 4 | -7.58 | -3.62 | -2.94 | -1.79 | 2.37 | 1.21 | 1.50 | 1.68 | 1.40 |
| 5 | -10.45 | -7.56 | -7.36 | -5.95 | 0.96 | -0.59 | -0.29 | 0.00 | -0.51 |
| 6 | -13.34 | -11.10 | -11.59 | -10.28 | -0.56 | -2.26 | -2.08 | -2.03 | -2.65 |
| 7 | -16.80 | -15.38 | -15.81 | -15.10 | -2.93 | -4.10 | -4.05 | -4.38 | -5.00 |
| 8 | -21.46 | -20.22 | -20.70 | -20.33 | -5.77 | -6.37 | -6.47 | -6.71 | -7.48 |
| 9 | -28.19 | -25.96 | -27.85 | -27.94 | -9.50 | -9.45 | -9.66 | -10.09 | -10.36 |
| 10 | -74.42 | -60.75 | -69.83 | -68.06 | -25.44 | -23.38 | -23.36 | -25.98 | -26.38 |
| R3K – Range (Maximum minus Minimum) | | | | | | | | | |
| 1 | 14.08 | 17.55 | 17.70 | 17.25 | 3.74 | 5.97 | 5.67 | 5.21 | 4.70 |
| 2 | 3.78 | 5.49 | 5.86 | 5.74 | 1.50 | 1.76 | 1.81 | 1.61 | 1.95 |
| 3 | 3.29 | 4.60 | 4.18 | 4.81 | 1.36 | 1.48 | 1.42 | 1.36 | 1.62 |
| 4 | 2.75 | 3.60 | 4.22 | 4.77 | 1.46 | 1.39 | 1.51 | 1.57 | 1.82 |
| 5 | 2.86 | 3.90 | 4.41 | 4.12 | 1.41 | 1.79 | 1.79 | 1.68 | 1.90 |
| 6 | 2.89 | 3.50 | 4.22 | 4.32 | 1.52 | 1.67 | 1.79 | 2.03 | 2.14 |
| 7 | 3.42 | 4.26 | 4.20 | 4.81 | 2.37 | 1.83 | 1.97 | 2.34 | 2.35 |
| 8 | 4.66 | 4.84 | 4.85 | 5.22 | 2.84 | 2.26 | 2.42 | 2.33 | 2.47 |
| 9 | 6.66 | 5.72 | 7.15 | 7.58 | 3.72 | 3.07 | 3.19 | 3.34 | 2.87 |
| 10 | 46.17 | 34.70 | 41.93 | 40.10 | 15.92 | 13.91 | 13.69 | 15.86 | 16.01 |
| Overall | 90.79 | 88.49 | 98.94 | 98.89 | 35.88 | 35.20 | 35.29 | 37.42 | 37.90 |

Table A 7

Descriptive Statistics for Question Point Range

This table describes the *Question Point Range* defined as the difference between the highest and lowest *Points* awarded for each question in each region and year. Variable definitions are described in the Appendix Table.

|  | Mean | Std. dev. | Min | 1% | 25% | Median | 75% | 99% | Max | Obs. |
| --- | --- | --- | --- | --- | --- | --- | --- | --- | --- | --- |
| S&P500 |  |  |  |  |  |  |  |  |  |  |
| 2013 | 3.5543 | 3.2429 | 0.0000 | 0.0000 | 1.0765 | 2.6728 | 4.9557 | 16.0000 | 16.0000 | 39,263 |
| 2014 | 1.7753 | 1.6426 | 0.0000 | 0.0000 | 0.4720 | 1.4140 | 2.6039 | 7.9349 | 7.9349 | 45,318 |
| 2015 | 1.9940 | 1.8485 | 0.0000 | 0.0000 | 0.5072 | 1.8481 | 2.6803 | 8.6795 | 8.6795 | 45,448 |
| 2016 | 1.8638 | 1.6725 | 0.0000 | 0.0000 | 0.5346 | 1.3546 | 3.0372 | 7.2098 | 7.9958 | 53,286 |
| 2017 | 0.7519 | 1.0243 | 0.0000 | 0.0000 | 0.2121 | 0.4109 | 0.8316 | 3.9896 | 7.3425 | 57,040 |
| 2018 | 0.6980 | 0.8561 | 0.0000 | 0.0000 | 0.1948 | 0.4215 | 0.8872 | 3.9896 | 6.1029 | 61,876 |
| 2019 | 0.6864 | 0.8495 | 0.0000 | 0.0000 | 0.1894 | 0.4215 | 0.8872 | 3.9896 | 6.1029 | 63,119 |
| 2020 | 0.6859 | 0.8650 | 0.0000 | 0.0000 | 0.1730 | 0.4041 | 0.8872 | 3.9896 | 6.1029 | 63,119 |
| 2021 | 0.5797 | 0.6151 | 0.0000 | 0.0000 | 0.1532 | 0.4397 | 0.8125 | 2.6250 | 3.1500 | 73,852 |
| All | 1.2451 | 1.6919 | 0.0000 | 0.0000 | 0.2441 | 0.5665 | 1.7626 | 7.9958 | 16.0000 | 502,321 |
| R3K |  |  |  |  |  |  |  |  |  |  |
| 2013 | 3.1973 | 2.6141 | 0.0000 | 0.0000 | 1.6336 | 2.1600 | 4.2650 | 12.2435 | 12.2435 | 178,777 |
| 2014 | 2.7458 | 2.0647 | 0.0000 | 0.0000 | 1.2806 | 2.3360 | 3.6057 | 11.2379 | 11.2379 | 214,123 |
| 2015 | 2.7351 | 2.0923 | 0.0000 | 0.0000 | 1.2772 | 2.3360 | 3.6470 | 11.2379 | 11.2379 | 217,304 |
| 2016 | 2.6055 | 2.1077 | 0.0000 | 0.0000 | 1.0174 | 2.2683 | 3.6852 | 8.2207 | 10.8710 | 265,146 |
| 2017 | 0.8473 | 1.0452 | 0.0000 | 0.0000 | 0.2993 | 0.4900 | 1.0235 | 4.6305 | 7.3425 | 278,300 |
| 2018 | 0.7868 | 0.8594 | 0.0000 | 0.0000 | 0.3014 | 0.4587 | 0.9662 | 3.9896 | 6.1029 | 300,328 |
| 2019 | 0.7464 | 0.8617 | 0.0000 | 0.0000 | 0.2533 | 0.4291 | 0.9547 | 3.9896 | 6.1029 | 309,245 |
| 2020 | 0.7660 | 0.8583 | 0.0000 | 0.0000 | 0.2782 | 0.4516 | 0.9547 | 3.9896 | 6.1029 | 321,437 |
| 2021 | 0.6425 | 0.6035 | 0.0000 | 0.0000 | 0.2500 | 0.4725 | 0.8875 | 2.6250 | 3.1500 | 360,528 |
| All | 1.4827 | 1.7831 | 0.0000 | 0.0000 | 0.3220 | 0.7609 | 2.1029 | 8.1765 | 12.2435 | 2,445,188 |

Table A 8

Question Point Range of Discretionary Questions

This table report the question point range for the four questions that include a subjective judgement by ISS. *Question Point Range* defined as the difference between the highest and lowest points awarded for each question in each region and year. The questions that we deem subjective are: 99 (Has the board adequately addressed a shareholder resolution supported by a majority vote?); 300 (Has ISS' qualitative review identified a pay-for-performance misalignment?); 301 (Has ISS identified a problematic pay practice or policy that raise concerns?); 345 (Has ISS determined that the Board of Directors had a material governance failure or took action that materially reduces shareholder rights?). The sample is Quality Score ratings for US firms for 2013-21, measured at 31st December each year. Variable definitions are described in the Appendix Table.

|  | 2013 | 2014 | 2015 | 2016 | 2017 | 2018 | 2019 | 2020 | 2021 | Average |
| --- | --- | --- | --- | --- | --- | --- | --- | --- | --- | --- |
| S&P500 |  |  |  |  |  |  |  |  |  |  |
| MV proposal | 4.7264 | 3.9565 | 3.9565 | 3.9823 | 2.6250 | 1.9963 | 1.9963 | 1.9963 | 0.4500 | 2.8540 |
| Pay-for-performance | 11.5964 | 7.9349 | 8.2987 | 5.1047 | 2.5099 | 2.3050 | 2.3050 | 2.3050 | 2.6250 | 4.9983 |
| Pay practice | 14.0056 | 6.3479 | 6.3479 | 5.4204 | 2.6651 | 2.4476 | 2.4476 | 2.4476 | 2.6250 | 4.9727 |
| Shareholder rights / governance failure | n.a. | 0.0000 | 3.9565 | 5.8539 | 3.8587 | 2.9346 | 2.9346 | 3.5215 | 2.4000 | 3.6371 |
| Total | 30.3284 | 18.2393 | 22.5596 | 20.3613 | 11.6587 | 9.6835 | 9.6835 | 10.2704 | 8.1000 | 15.6539 |
| R3K |  |  |  |  |  |  |  |  |  |  |
| MV proposal | 2.3560 | 3.4578 | 3.4578 | 4.5645 | 2.6250 | 1.9963 | 1.9963 | 1.9963 | 0.4500 | 2.5444 |
| Pay-for-performance | 9.6118 | 8.2987 | 8.2987 | 5.9145 | 2.5099 | 2.3050 | 2.3050 | 2.3050 | 2.6250 | 4.9082 |
| Pay practice | 8.0000 | 6.4546 | 6.4546 | 6.3817 | 2.6651 | 2.4476 | 2.4476 | 2.4476 | 2.6250 | 4.4360 |
| Shareholder rights / governance failure | n.a. | 8.0682 | 8.0682 | 8.1765 | 4.6305 | 3.5215 | 3.5215 | 3.5215 | 2.4000 | 5.2385 |
| Total | 19.9678 | 26.2793 | 26.2793 | 25.0372 | 12.4305 | 10.2704 | 10.2704 | 10.2704 | 8.1000 | 16.5450 |

Table A 9

Descriptive Statistics for Question Weight

This table reports descriptive statistics for the *Question Weight* variable which is estimated as *Question Point Range / Sum of Points Range*. Variable definitions are described in the Appendix Table.

|  | Mean | Std. dev. | Min | 1% | 25% | Median | 75% | 99% | Max | Obs. |
| --- | --- | --- | --- | --- | --- | --- | --- | --- | --- | --- |
| S&P500 |  |  |  |  |  |  |  |  |  |  |
| 2013 | 0.0287 | 0.0262 | 0.0000 | 0.0000 | 0.0087 | 0.0216 | 0.0400 | 0.1292 | 0.1292 | 39,263 |
| 2014 | 0.0247 | 0.0229 | 0.0000 | 0.0000 | 0.0066 | 0.0197 | 0.0362 | 0.1105 | 0.1105 | 45,318 |
| 2015 | 0.0279 | 0.0259 | 0.0000 | 0.0000 | 0.0071 | 0.0258 | 0.0375 | 0.1214 | 0.1214 | 45,448 |
| 2016 | 0.0263 | 0.0236 | 0.0000 | 0.0000 | 0.0076 | 0.0191 | 0.0429 | 0.1018 | 0.1130 | 53,286 |
| 2017 | 0.0207 | 0.0282 | 0.0000 | 0.0000 | 0.0058 | 0.0113 | 0.0229 | 0.1097 | 0.2019 | 57,040 |
| 2018 | 0.0198 | 0.0242 | 0.0000 | 0.0000 | 0.0055 | 0.0119 | 0.0251 | 0.1130 | 0.1728 | 61,876 |
| 2019 | 0.0180 | 0.0222 | 0.0000 | 0.0000 | 0.0050 | 0.0110 | 0.0232 | 0.1045 | 0.1598 | 63,119 |
| 2020 | 0.0163 | 0.0206 | 0.0000 | 0.0000 | 0.0041 | 0.0096 | 0.0211 | 0.0951 | 0.1454 | 63,119 |
| 2021 | 0.0175 | 0.0186 | 0.0000 | 0.0000 | 0.0046 | 0.0133 | 0.0245 | 0.0793 | 0.0951 | 73,852 |
| All | 0.0215 | 0.0238 | 0.0000 | 0.0000 | 0.0057 | 0.0134 | 0.0301 | 0.1122 | 0.2019 | 502,321 |
| R3K |  |  |  |  |  |  |  |  |  |  |
| 2013 | 0.0352 | 0.0288 | 0.0000 | 0.0000 | 0.0180 | 0.0238 | 0.0470 | 0.1349 | 0.1349 | 178,777 |
| 2014 | 0.0310 | 0.0233 | 0.0000 | 0.0000 | 0.0145 | 0.0264 | 0.0407 | 0.1270 | 0.1270 | 214,123 |
| 2015 | 0.0276 | 0.0211 | 0.0000 | 0.0000 | 0.0129 | 0.0236 | 0.0369 | 0.1136 | 0.1136 | 217,304 |
| 2016 | 0.0263 | 0.0213 | 0.0000 | 0.0000 | 0.0103 | 0.0229 | 0.0373 | 0.0831 | 0.1099 | 265,146 |
| 2017 | 0.0236 | 0.0291 | 0.0000 | 0.0000 | 0.0083 | 0.0137 | 0.0285 | 0.1291 | 0.2047 | 278,300 |
| 2018 | 0.0223 | 0.0244 | 0.0000 | 0.0000 | 0.0086 | 0.0130 | 0.0274 | 0.1133 | 0.1734 | 300,328 |
| 2019 | 0.0212 | 0.0244 | 0.0000 | 0.0000 | 0.0072 | 0.0122 | 0.0271 | 0.1131 | 0.1729 | 309,245 |
| 2020 | 0.0205 | 0.0229 | 0.0000 | 0.0000 | 0.0074 | 0.0121 | 0.0255 | 0.1066 | 0.1631 | 321,437 |
| 2021 | 0.0170 | 0.0159 | 0.0000 | 0.0000 | 0.0066 | 0.0125 | 0.0234 | 0.0693 | 0.0831 | 360,528 |
| All | 0.0239 | 0.0240 | 0.0000 | 0.0000 | 0.0085 | 0.0161 | 0.0322 | 0.1131 | 0.2047 | 2,445,188 |

Table A 10

The Incremental Explanatory Power of the S&P500 Dummy Variable to Explain Discretionary Answers

This table reports the R2 from the regressions of the answers to the four questions that include discretionary judgement by ISS. If the answer to these questions is negative then we assign the value one, and zero otherwise. We regress these dummy variables on all other rating model answers (apart from those to the four discretionary questions). These answers take the form of categorical answers (*Answer ID*) and numerical answers (*Answer Value*), and we employ both as controls in the model. In Panel A we do not include a dummy variable for S&P500 firms, whereas in Panel B we do include this dummy variable. Variable definitions are described in the Appendix Table.

|  | 2013 | 2014 | 2015 | 2016 | 2017 | 2018 | 2019 | 2020 | 2021 |
| --- | --- | --- | --- | --- | --- | --- | --- | --- | --- |
| Panel A: R2 for all observations with no dummy variable for S&P500 | | | | | | | | | |
| MV proposal | 0.201 | 0.18 | 0.191 | 0.171 | 0.208 | 0.477 | 0.236 | 0.107 | 0.264 |
| Pay-for-performance | 0.262 | 0.469 | 0.472 | 0.348 | 0.475 | 0.546 | 0.518 | 0.455 | 0.516 |
| Pay practice | 0.278 | 0.392 | 0.257 | 0.223 | 0.395 | 0.41 | 0.328 | 0.34 | 0.318 |
| Shareholder rights | n.a. | 0.11 | 0.15 | 0.386 | 0.545 | 0.541 | 0.595 | 0.546 | 0.536 |
| Material governance | n.a. | n.a. | n.a. | 0.233 | 0.597 | 0.54 | 0.551 | 0.539 | 0.473 |
| Shareholder rights & Material governance | n.a. | n.a. | n.a. | 0.053 | 0.209 | 0.329 | 0.331 | 0.287 | 0.348 |
| Any negative answer | 0.295 | 0.489 | 0.46 | 0.356 | 0.558 | 0.576 | 0.604 | 0.59 | 0.631 |
| Observations | 2760 | 2851 | 2856 | 2976 | 2917 | 2921 | 2932 | 3044 | 2935 |
| Panel B: R2 for all observations with dummy variable for S&P500 | | | | | | | | | |
| MV proposal | 0.203 | 0.185 | 0.193 | 0.172 | 0.209 | 0.478 | 0.236 | 0.107 | 0.265 |
| Pay-for-performance | 0.262 | 0.469 | 0.473 | 0.348 | 0.475 | 0.546 | 0.519 | 0.456 | 0.517 |
| Pay practice | 0.278 | 0.392 | 0.257 | 0.223 | 0.396 | 0.41 | 0.329 | 0.340 | 0.318 |
| Shareholder rights | n.a. | 0.11 | 0.15 | 0.386 | 0.545 | 0.541 | 0.595 | 0.546 | 0.536 |
| Material governance | n.a. | n.a. | n.a. | 0.234 | 0.597 | 0.54 | 0.552 | 0.539 | 0.473 |
| Shareholder rights & Material governance | n.a. | n.a. | n.a. | 0.056 | 0.209 | 0.329 | 0.331 | 0.287 | 0.348 |
| Any negative answer | 0.295 | 0.489 | 0.461 | 0.356 | 0.558 | 0.576 | 0.604 | 0.590 | 0.631 |
| Observations | 2760 | 2851 | 2856 | 2976 | 2917 | 2921 | 2932 | 3044 | 2935 |
| Panel C: Difference in R2 between Panels A and B | | | | | | | | | |
| MV proposal | 0.002 | 0.005 | 0.002 | 0.001 | 0.001 | 0.001 | 0.000 | 0.000 | 0.001 |
| Pay-for-performance | 0.000 | 0.000 | 0.001 | 0.000 | 0.000 | 0.000 | 0.001 | 0.001 | 0.001 |
| Pay practice | 0.000 | 0.000 | 0.000 | 0.000 | 0.001 | 0.000 | 0.001 | 0.000 | 0.000 |
| Shareholder rights | n.a. | 0.000 | 0.000 | 0.000 | 0.000 | 0.000 | 0.000 | 0.000 | 0.000 |
| Material governance | n.a. | n.a. | n.a. | 0.001 | 0.000 | 0.000 | 0.001 | 0.000 | 0.000 |
| Shareholder rights & Material governance | n.a. | n.a. | n.a. | 0.003 | 0.000 | 0.000 | 0.000 | 0.000 | 0.000 |
| Shareholder rights or Material governance | n.a. | 0.000 | 0.000 | 0.001 | 0.000 | 0.000 | 0.000 | 0.000 | 0.000 |
| Any negative answer | 0.000 | 0.000 | 0.001 | 0.000 | 0.000 | 0.000 | 0.000 | 0.000 | 0.000 |

Table A 11

Regressions of Discretionary Inputs on Consulting Client Proxy and Private Equity Ownership: Robustness Tests

This table reports the results from the regressions of the answers to the four questions that include discretionary judgement by ISS, on private equity ownership of ISS and the S&P500 dummy variable. If the answer to the four questions is negative then we assign the value one, and zero otherwise. The years 2014 and 2020 are associated with private equity ownership of ISS whilst the years 2013 and 2021 are not. The sample includes S&P500 and R3K firms and the sample years 2015-2019 are excluded. In Panel A the control variables are the points from all other rating model answers. In Panel B the control variables are the categorical answers (*Answer ID*) and numerical answers (*Answer Value*), and firm fixed effects. In Panel C the control variables are the points from all other rating model answers and firm fixed effects. Variable definitions are described in the Appendix Table.

|  | MV proposal | Pay-for-performance | Pay practice | Shareholder rights | Material governance | Any |
| --- | --- | --- | --- | --- | --- | --- |
| Panel A: Control Variables are Answer Points | | | | | | |
| Panel A1: 2013-2014 | | | | | | |
| Private Equity Ownership | -0.00706 | -0.00448 | -0.0437* | -0.00183 | n.a. | -0.0365 |
|  | (0.00868) | (0.0307) | (0.0237) | (0.00563) | n.a. | (0.0354) |
| S&P500 | 0.0171*** | -0.0452** | -0.000920 | 0.000977 | n.a. | -0.0447* |
|  | (0.00573) | (0.0203) | (0.0157) | (0.00372) | n.a. | (0.0234) |
| Private Equity Ownership*S&P500 | -0.00362 | 0.0417 | 0.0193 | -0.00344 | n.a. | 0.0611** |
|  | (0.00752) | (0.0266) | (0.0205) | (0.00488) | n.a. | (0.0307) |
| R2 | 0.069 | 0.340 | 0.125 | 0.041 | n.a. | 0.317 |
| Observations | 5,611 | 5,611 | 5,611 | 5,611 | n.a. | 5,611 |
| Panel A2: 2020-2021 | | | | | | |
| Non-Private Equity Ownership | 0.000652 | 0.126*** | 0.0191 | 0.0356 | 0.135*** | 0.196*** |
|  | (0.00852) | (0.0416) | (0.0324) | (0.0499) | (0.0319) | (0.0640) |
| S&P500 | 0.00208 | 0.0292** | 0.0335*** | 0.0169 | 0.00818 | 0.0640*** |
|  | (0.00284) | (0.0138) | (0.0108) | (0.0166) | (0.0106) | (0.0213) |
| Non-Private Equity Ownership*S&P500 | 0.00614 | 0.0175 | -0.0206 | 0.00236 | -0.0141 | -0.0209 |
|  | (0.00395) | (0.0192) | (0.0150) | (0.0231) | (0.0148) | (0.0296) |
| R2 | 0.067 | 0.427 | 0.159 | 0.386 | 0.176 | 0.463 |
| Observations | 5,963 | 5,963 | 5,963 | 5,963 | 5,963 | 5,963 |
| Panel B: Control Variables are Answer IDs and Values with Firm Fixed Effects | | | | | | |
| Panel B1: 2013-2014 | | | | | | |
| Private Equity Ownership | -0.000306 | -0.0459 | -0.291 | -0.0254 | n.a. | -0.230 |
|  | (0.0678) | (0.264) | (0.184) | (0.0453) | n.a. | (0.290) |
| S&P500 | 0.00906 | -0.144* | 0.0152 | 0.0124 | n.a. | -0.0760 |
|  | (0.0196) | (0.0764) | (0.0532) | (0.0131) | n.a. | (0.0838) |
| Private Equity Ownership*S&P500 | 0.00624 | -0.0180 | -0.00970 | -0.00262 | n.a. | -0.00835 |
|  | (0.00521) | (0.0203) | (0.0141) | (0.00348) | n.a. | (0.0223) |
| R2 | 0.159 | 0.225 | 0.250 | 0.108 | n.a. | 0.255 |
| Observations | 5,611 | 5,611 | 5,611 | 5,611 | n.a. | 5,611 |
| Panel B2: 2020-2021 | | | | | | |
| Non-Private Equity Ownership | 0.0645 | -0.0645 | 0.540 | 0.247 | -0.240 | 0.0304 |
|  | (0.0940) | (0.506) | (0.423) | (0.372) | (0.206) | (0.525) |
| S&P500 | -0.00458 | -0.0386 | -0.00676 | -0.0717* | 0.00437 | -0.0337 |
|  | (0.00983) | (0.0529) | (0.0442) | (0.0389) | (0.0215) | (0.0549) |
| Non-Private Equity Ownership*S&P500 | 0.00538* | 0.0242 | -0.0103 | 0.00627 | 0.00100 | 0.0205 |
|  | (0.00306) | (0.0165) | (0.0138) | (0.0121) | (0.00671) | (0.0171) |
| R2 | 0.142 | 0.454 | 0.341 | 0.194 | 0.274 | 0.499 |
| Observations | 5,963 | 5,963 | 5,963 | 5,963 | 5,963 | 5,963 |
| Panel C: Control Variables are Answer Points with Firm Fixed Effects | | | | | | |
| Panel C1: 2013-2014 | | | | | | |
| Private Equity Ownership | -0.00541 | 0.0585 | -0.0266 | 0.00170 | n.a. | 0.0161 |
|  | (0.0134) | (0.0500) | (0.0374) | (0.00868) | n.a. | (0.0563) |
| S&P500 | 0.00581 | -0.109 | 0.0329 | 0.00516 | n.a. | -0.0566 |
|  | (0.0204) | (0.0764) | (0.0571) | (0.0133) | n.a. | (0.0860) |
| Private Equity Ownership*S&P500 | 0.00405 | -0.00404 | -0.0284 | 0.00404 | n.a. | 0.0231 |
|  | (0.0111) | (0.0414) | (0.0310) | (0.00719) | n.a. | (0.0466) |
| R2 | 0.046 | 0.191 | 0.099 | 0.047 | n.a. | 0.182 |
| Observations | 5,611 | 5,611 | 5,611 | 5,611 | n.a. | 5,611 |
| Panel C2: 2020-2021 | | | | | | |
| Non-Private Equity Ownership | 0.0173 | 0.154** | -0.0173 | -0.0179 | 0.0314 | -0.00658 |
|  | (0.0122) | (0.0675) | (0.0586) | (0.0492) | (0.0287) | (0.0749) |
| S&P500 | -0.00595 | -0.0628 | -0.00111 | -0.0858** | -0.00967 | -0.0739 |
|  | (0.00953) | (0.0529) | (0.0459) | (0.0385) | (0.0225) | (0.0587) |
| Non-Private Equity Ownership*S&P500 | 0.00735** | 0.0341* | -0.0268* | 0.00634 | 0.00349 | 0.0200 |
|  | (0.00335) | (0.0186) | (0.0162) | (0.0136) | (0.00791) | (0.0207) |
| R2 | 0.063 | 0.366 | 0.174 | 0.080 | 0.081 | 0.333 |
| Observations | 5,963 | 5,963 | 5,963 | 5,963 | 5,963 | 5,963 |

Table A 12

Descriptive Statistics for Difference Sum of Points

This table describes the descriptive statistics for the variable *Difference Sum of Points*, calculated as *Sum of Points* minus *Sum of Points Estimated* variable. *Sum of Points* is reported by ISS and *Sum of Points Estimated* is our estimation of the sum of *Points*. Variable definitions are described in the Appendix Table.

|  | Mean | Std. dev. | Min | 1% | 25% | Median | 75% | 99% | Max | Obs. |
| --- | --- | --- | --- | --- | --- | --- | --- | --- | --- | --- |
| S&P500 |  |  |  |  |  |  |  |  |  |  |
| 2013 | 0.0130 | 0.2844 | -0.0049 | -0.0030 | -0.0001 | -0.0001 | 0.0000 | 0.0094 | 6.3396 | 497 |
| 2014 | -0.0001 | 0.0001 | -0.0005 | -0.0004 | -0.0002 | -0.0001 | 0.0000 | 0.0002 | 0.0002 | 498 |
| 2015 | -0.0001 | 0.0001 | -0.0006 | -0.0003 | -0.0001 | -0.0001 | 0.0000 | 0.0002 | 0.0003 | 494 |
| 2016 | 0.0001 | 0.0001 | -0.0003 | -0.0003 | 0.0000 | 0.0001 | 0.0002 | 0.0004 | 0.0005 | 498 |
| 2017 | 0.0001 | 0.0001 | -0.0004 | -0.0003 | 0.0000 | 0.0001 | 0.0002 | 0.0004 | 0.0005 | 496 |
| 2018 | -0.0023 | 0.0765 | -1.4040 | -0.1016 | 0.0001 | 0.0002 | 0.0003 | 0.0897 | 0.7100 | 499 |
| 2019 | 0.0002 | 0.0001 | -0.0002 | -0.0001 | 0.0001 | 0.0002 | 0.0003 | 0.0005 | 0.0005 | 497 |
| 2020 | 0.0002 | 0.0001 | -0.0003 | -0.0002 | 0.0001 | 0.0002 | 0.0003 | 0.0005 | 0.0006 | 497 |
| 2021 | 0.0000 | 0.0000 | 0.0000 | 0.0000 | 0.0000 | 0.0000 | 0.0000 | 0.0000 | 0.0000 | 499 |
| All | 0.0012 | 0.0982 | -1.4040 | -0.0003 | 0.0000 | 0.0000 | 0.0002 | 0.0018 | 6.3396 | 4,475 |
| R3K |  |  |  |  |  |  |  |  |  |  |
| 2013 | -0.0001 | 0.0355 | -1.6321 | -0.0021 | 0.0001 | 0.0001 | 0.0002 | 0.0086 | 0.4297 | 2,263 |
| 2014 | 0.0001 | 0.0001 | -0.0004 | -0.0002 | 0.0000 | 0.0000 | 0.0001 | 0.0004 | 0.0006 | 2,353 |
| 2015 | 0.0001 | 0.0001 | -0.0004 | -0.0002 | 0.0000 | 0.0001 | 0.0002 | 0.0004 | 0.0006 | 2,362 |
| 2016 | -0.0002 | 0.0001 | -0.0006 | -0.0004 | -0.0003 | -0.0002 | -0.0001 | 0.0002 | 0.0003 | 2,478 |
| 2017 | 0.0000 | 0.0001 | -0.0005 | -0.0003 | -0.0001 | 0.0000 | 0.0001 | 0.0004 | 0.0005 | 2,420 |
| 2018 | -0.0115 | 0.1809 | -3.0482 | -0.5839 | 0.0001 | 0.0002 | 0.0003 | 0.0006 | 3.1043 | 2,422 |
| 2019 | 0.0002 | 0.0001 | -0.0003 | -0.0001 | 0.0001 | 0.0002 | 0.0003 | 0.0005 | 0.0006 | 2,435 |
| 2020 | 0.0002 | 0.0002 | -0.0003 | -0.0002 | 0.0001 | 0.0002 | 0.0003 | 0.0005 | 0.0007 | 2,531 |
| 2021 | 0.0000 | 0.0000 | 0.0000 | 0.0000 | 0.0000 | 0.0000 | 0.0000 | 0.0000 | 0.0000 | 2,436 |
| All | -0.0013 | 0.0616 | -3.0482 | -0.0004 | 0.0000 | 0.0001 | 0.0002 | 0.0005 | 3.1043 | 21,700 |
